# Supplementary material for: Ferroelectrically modulated and enhanced photoresponse of a Ag/PZT/NSTO self-powered photodetector in the ultraviolet range
Source: Royal Society of Chemistry journal article supplement (doi:10.1039/d3tc04572b), 2024-01-01
Supplement: d3tc04572b1.pdf [file d3tc04572b1.pdf]

Supplementary Materials for

**Ferroelectrically modulated and enhanced photoresponse of  
Ag/PZT/NSTO self-powered photodetector in ultraviolet range**

Zhuokun Han <sup>a</sup>, Bingcheng Luo <sup>a</sup>, Shuanhu Wang <sup>a</sup>, Wei Zhai <sup>a</sup>, Jianyuan Wang <sup>a,\*</sup>

<sup>a</sup> *MOE Key Laboratory of Materials Physics and Chemistry under Extraordinary  
Conditions, School of Physical Science and Technology, Northwestern Polytechnical  
University, Xi'an 710072, China*

\* Author to whom correspondence should be addressed: [wangjy@nwpu.edu.cn](mailto:wangjy@nwpu.edu.cn)

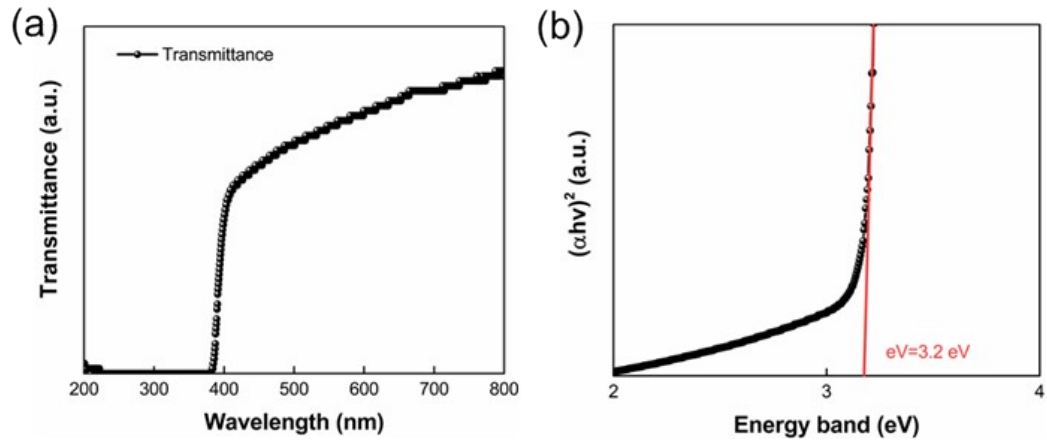

**Fig. S1.** (a) Transmission spectrum of the PZT film. (b) Plot of  $(\alpha E)^2$  versus  $E$  for the PZT film near the optical band gap and linear extrapolation to determine the optical band gap.

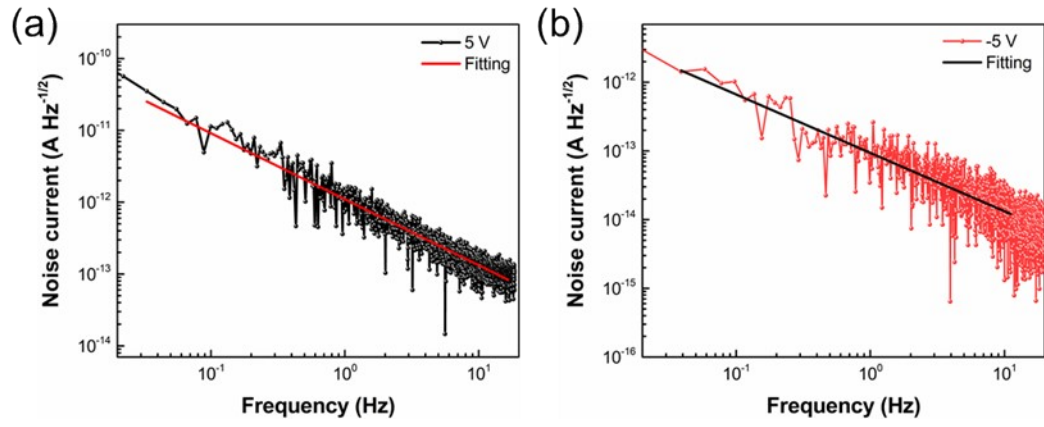

**Fig. S2.** Frequency-dependent noise current of device at (a) 5 V  $V_p$  (polarization voltage) and (b) -5 V  $V_p$  at a bias voltage of 0 V.

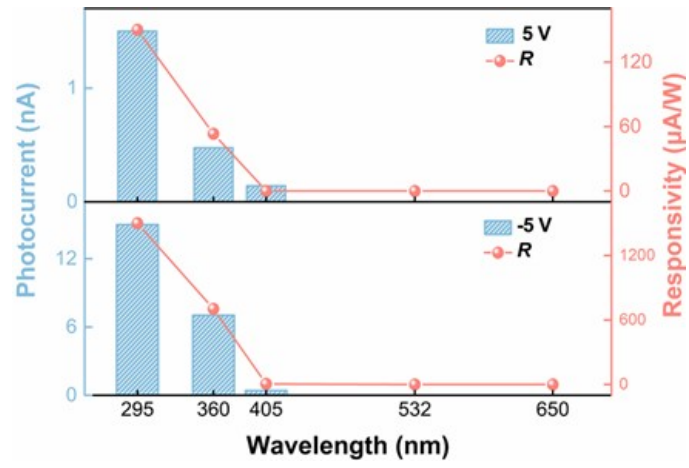

**Fig. S3.** Wavelength-dependent photocurrent and responsivity of the device without a bias voltage.

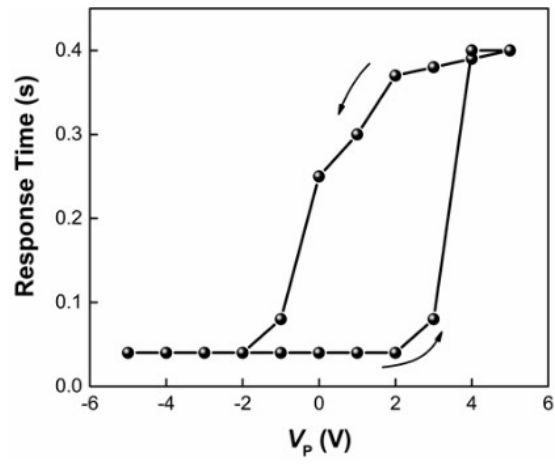

**Figure S4.** Response time loop versus  $V_p$ .
